# Supplementary material for: Mechanical loading inhibits hypertrophy in chondrogenically differentiating hMSCs within a biomimetic hydrogel
Source: Royal Society of Chemistry journal article supplement (doi:10.1039/c6tb00006a), 2016-01-01
Supplement: c6tb00006a1.pdf [file c6tb00006a1.pdf]

A.

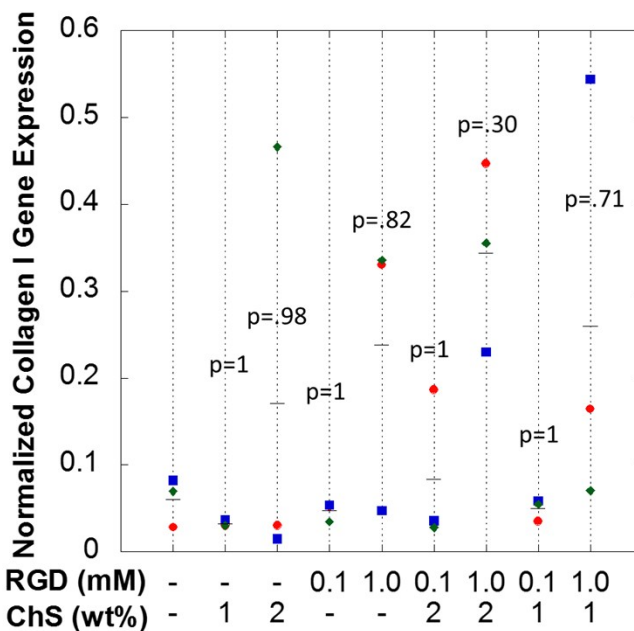

B.

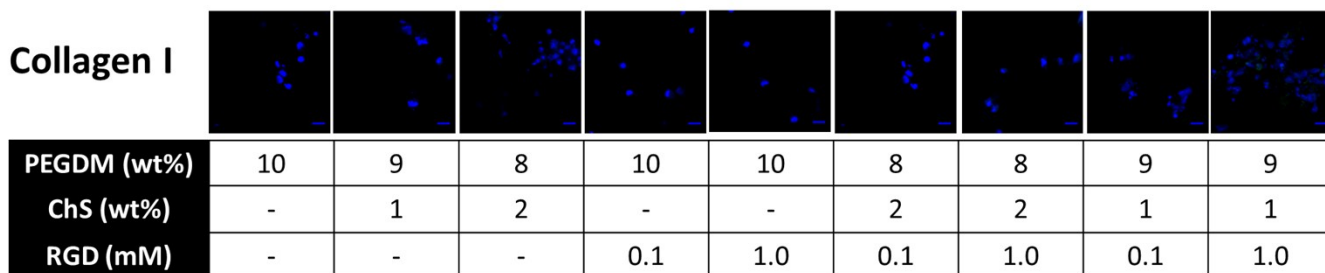

**Supplemental Figure 1.** The effects of ECM analogs on collagen I expression in hMSCs undergoing chondrogenesis under free swelling culture conditions after 14 days of culture. A) Gene expression (by qPCR) for collagen I. The symbols (diamond (Donor 1), square (Donor 2), circle (Donor 3)) represent the mean for each donor (n=4 technical replicates). The line (—) represents the mean for all donors (n=3) and *p* values are relative to PEG-only hydrogel. Normalized expression is defined as relative expression at day 14 normalized to relative expression at 24 hours after encapsulation. C) Immunohistochemistry staining for collagen I (green) (Cell nuclei (blue) were counterstained with Dapi. Scale bar = 20µm.
