# Supplementary material for: Mechanical loading inhibits hypertrophy in chondrogenically differentiating hMSCs within a biomimetic hydrogel
Source: Royal Society of Chemistry journal article supplement (doi:10.1039/c6tb00006a), 2016-01-01
Supplement: c6tb00006a3.pdf [file c6tb00006a3.pdf]

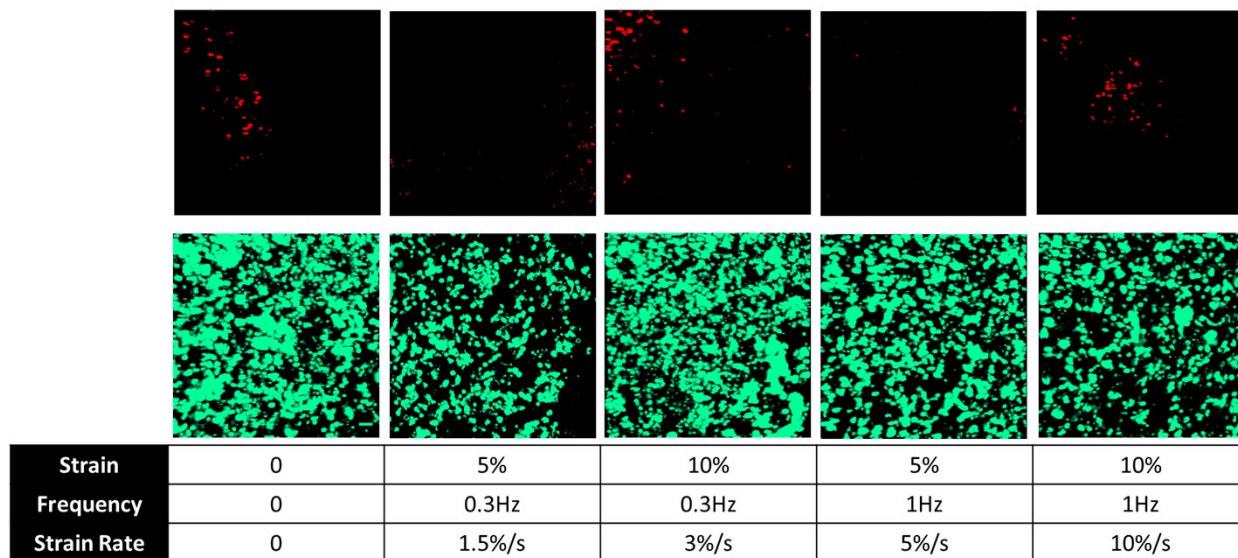

**Supplemental Figure 3.** The effects of mechanical loading on hMSC viability after 21 days of culture (7 days of free swelling followed by 14 days of dynamic loading). Representative images show live cells stained green (calcein-AM) and dead cells stained red (ethidium homodimer) at 21 days (100x magnification).
