# Supplementary material for: Mechanical loading inhibits hypertrophy in chondrogenically differentiating hMSCs within a biomimetic hydrogel
Source: Royal Society of Chemistry journal article supplement (doi:10.1039/c6tb00006a), 2016-01-01
Supplement: c6tb00006a4.pdf [file c6tb00006a4.pdf]

A.

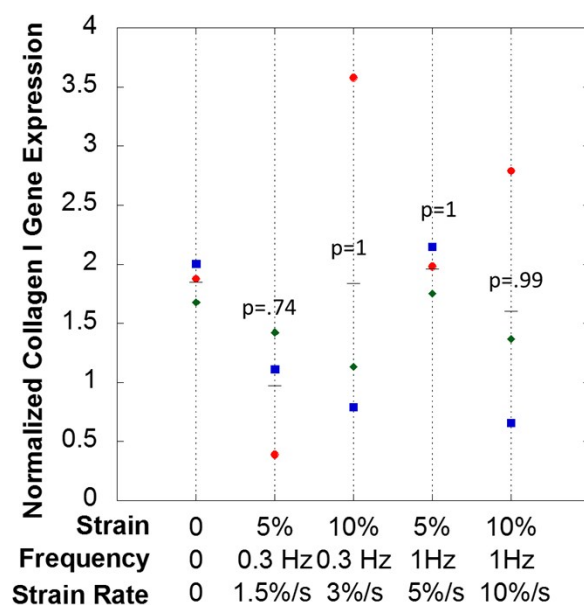

B.

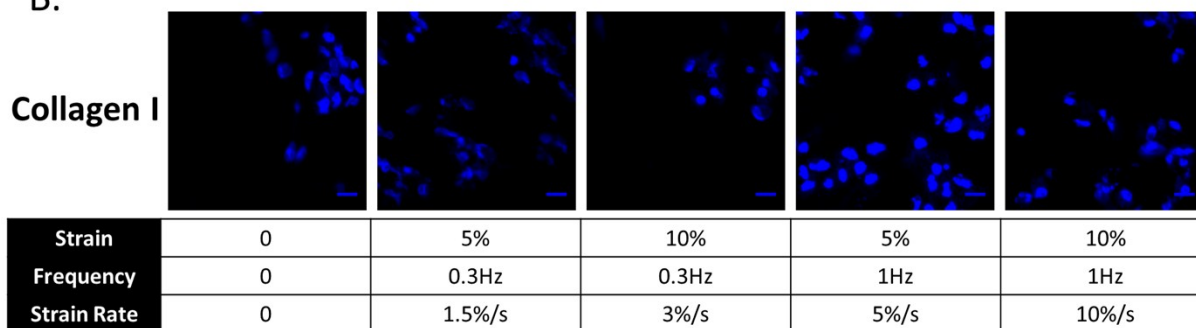

**Supplemental Figure 4.** The effects of dynamic loading on collagen I expression in hMSCs undergoing chondrogenesis in a biomimetic PEG-based hydrogel containing 0.1 mM RGD and 1 wt% ChS after 21 days of culture. A) Gene expression (by qPCR) for collagen I. Normalized expression is defined as relative expression at day 21 normalized to relative expression for pre-encapsulated hMSCs. C) Immunohistochemistry staining for collagen I (green). Cell nuclei (blue) were counterstained with Dapi. Scale bar = 20μm. In A and B, the symbols (diamond (Donor 1), square (Donor 2), circle (Donor 3)) represent the mean for each donor (n=4 technical replicates). The line (—) represents the mean for all donors (n=3).
