# Supplementary material for: Mechanical loading inhibits hypertrophy in chondrogenically differentiating hMSCs within a biomimetic hydrogel
Source: Royal Society of Chemistry journal article supplement (doi:10.1039/c6tb00006a), 2016-01-01
Supplement: c6tb00006a5.pdf [file c6tb00006a5.pdf]

**Table S1.** qPCR Primer Sequences

| <b>Gene</b>                | <b>Forward Sequence</b>  | <b>Reverse Sequence</b>      |
|----------------------------|--------------------------|------------------------------|
| L30<br>(housekeeping gene) | TTAGCGGCTGCTGTTGGTT      | TCCAGCGACTTTTTTCGTCTTC       |
| Collagen II                | CAACTGCGCAACGTCCAGAT     | TCTTGCAGTGGTAGGTGATGTTCT     |
| Collagen X                 | TTTTGCTGCTAGTATCCTTGAACT | ACCTCTAGGGCCAGAAGGAC         |
| Collagen I                 | AGGAAGGGCCACGACAAAG      | CAGTTACACAAGGAACAGAACAGTCTCT |
